# Supplementary material
Source: ML conference proceedings conference paper supplement (https://openreview.net/forum?id=G5sPv4KSjR)

$$L_1(\pi_1) = 2.45$$

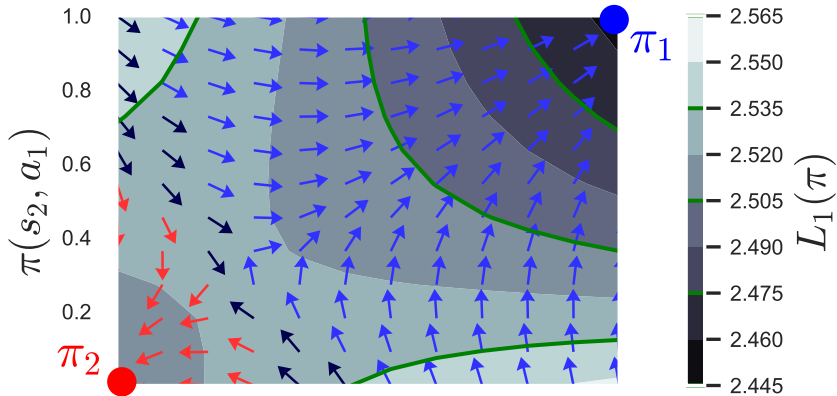

$$L_1(\pi_2) = 2.51$$

Local Minimum

$$\pi(s_1, a_1)$$

Supplement: supplementary_material [file attachment]

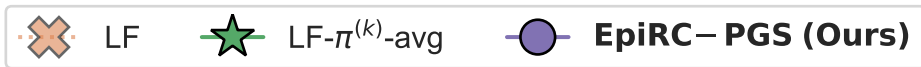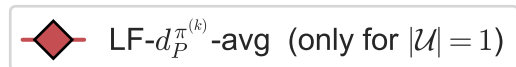

(a) RCMDP ( $|\mathcal{U}| = 5$ )

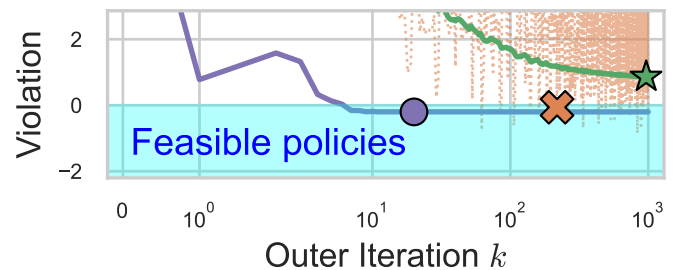

(b) RCMDP (KL)

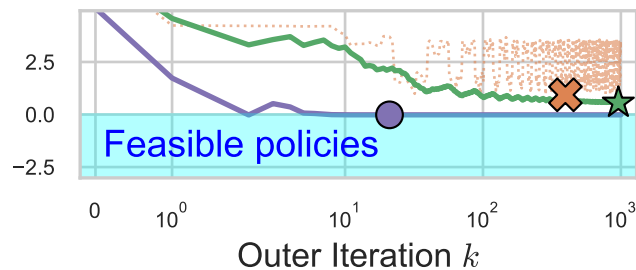

(c) CMDP ( $|\mathcal{U}| = 1$ )

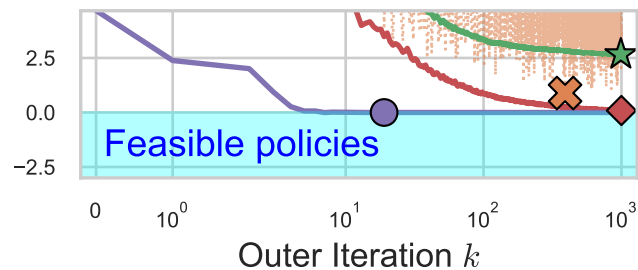

Objective Return  
(Smaller is better)

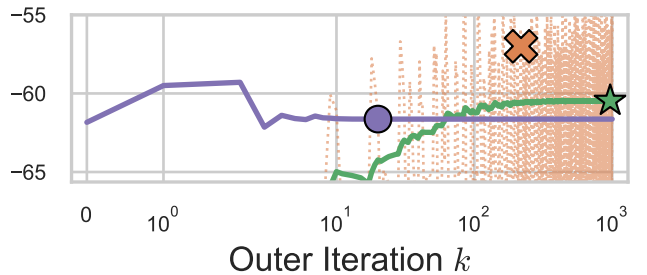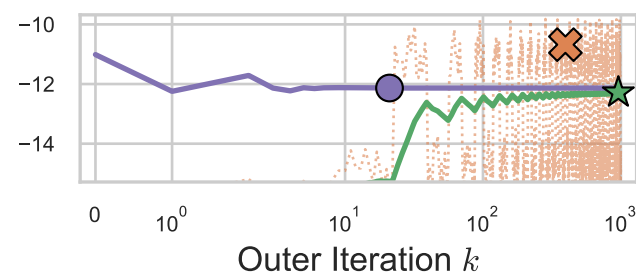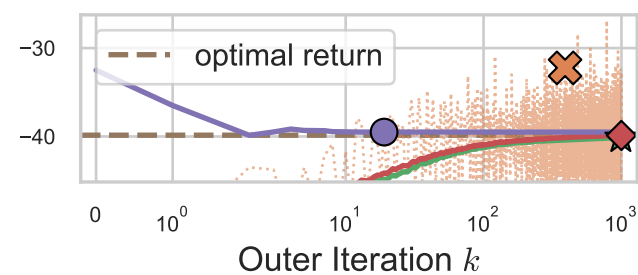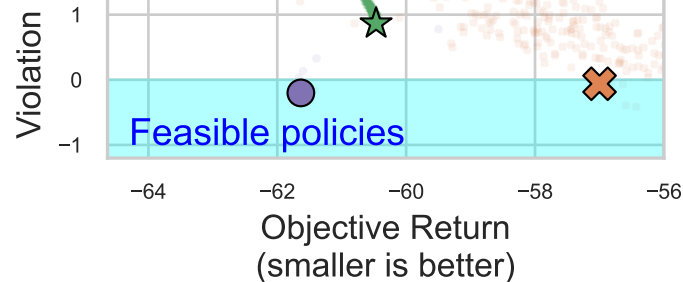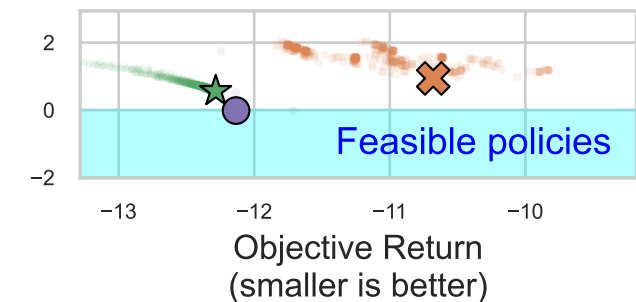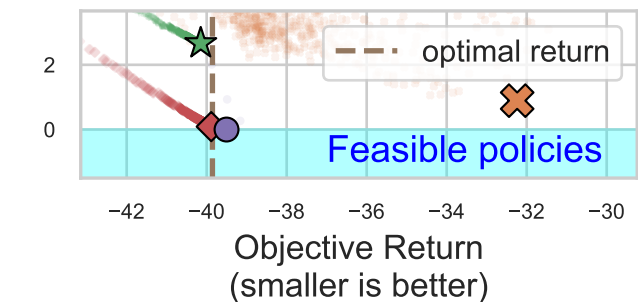

Supplement: supplementary_material [file attachment]

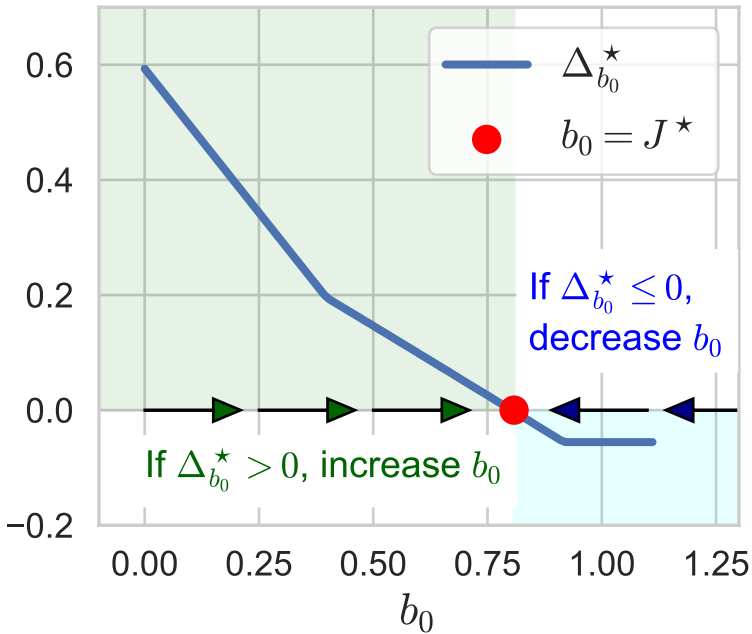

Supplement: supplementary_material [file attachment]
